# Supplementary material for: Treatment Planning and Delivery of Whole Brain Irradiation with Hippocampal Avoidance in Rats
Source: PubMed Central journal article supplement (PMC4670078; doi:10.1371/journal.pone.0143208), 2015-12-04

Supplemental figure 1: Registration points F1-6 on MRI and CBCT images

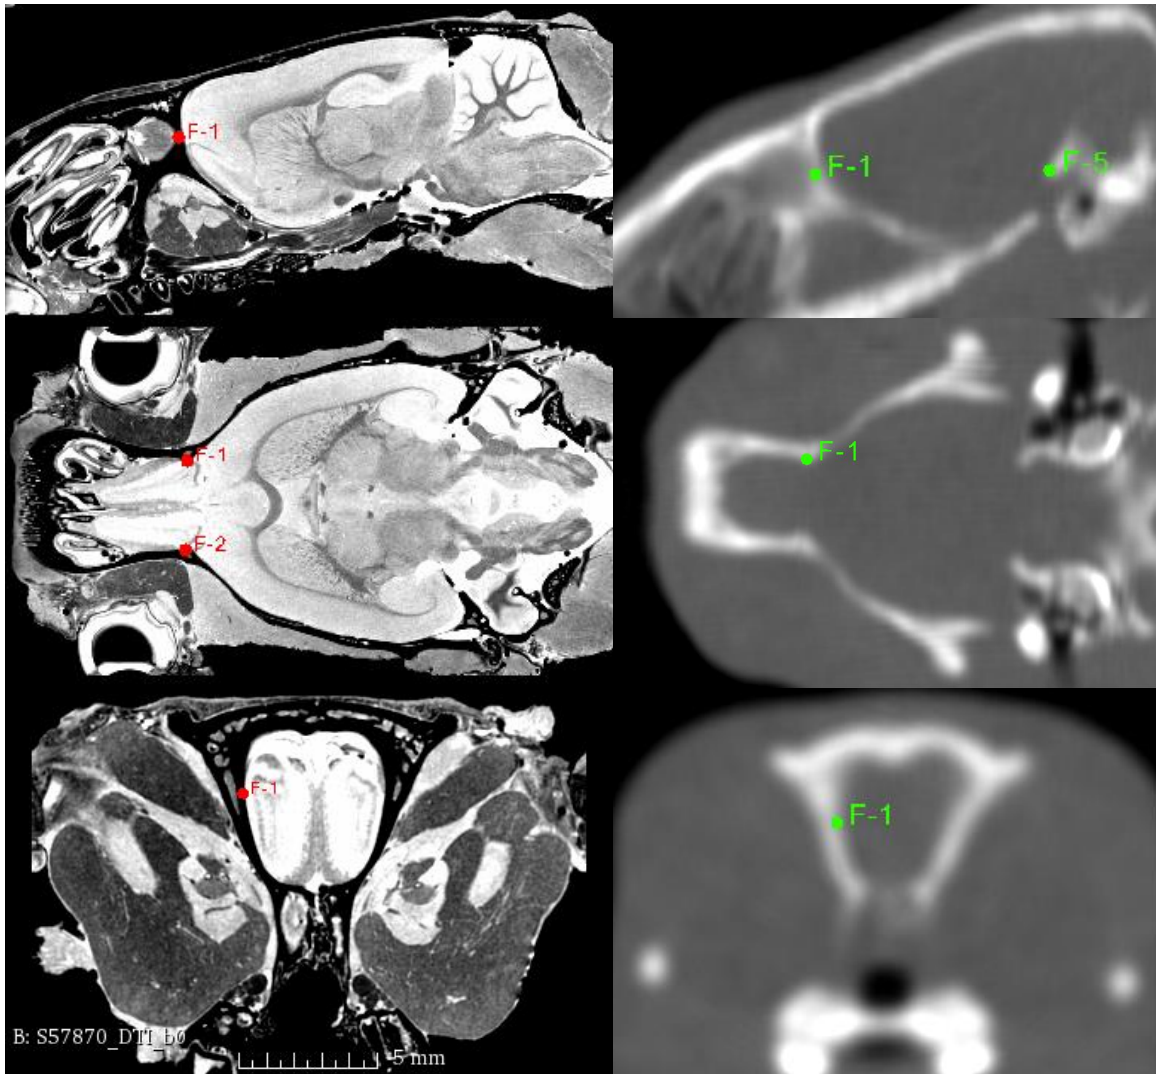

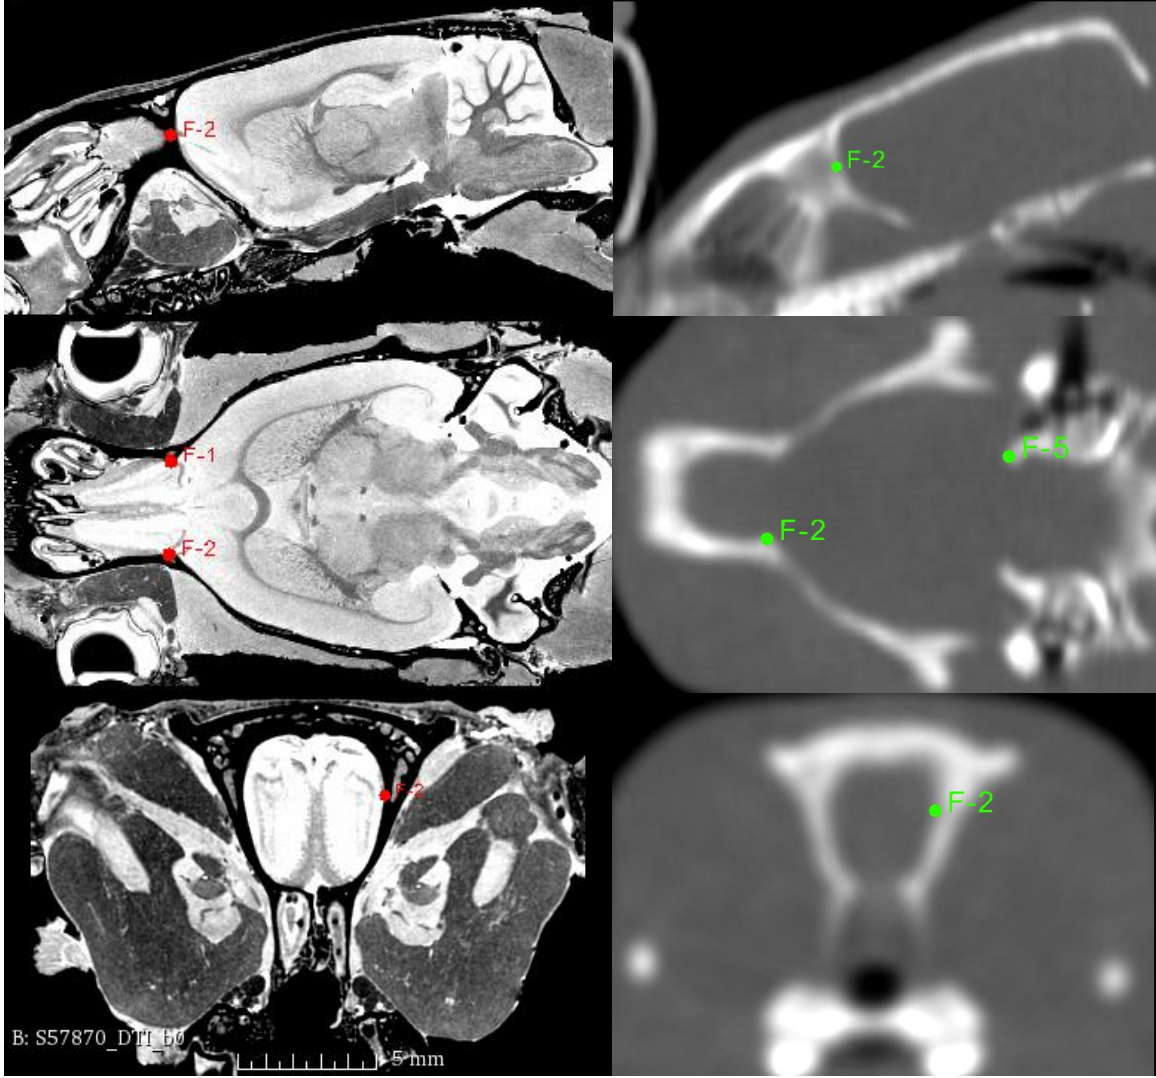

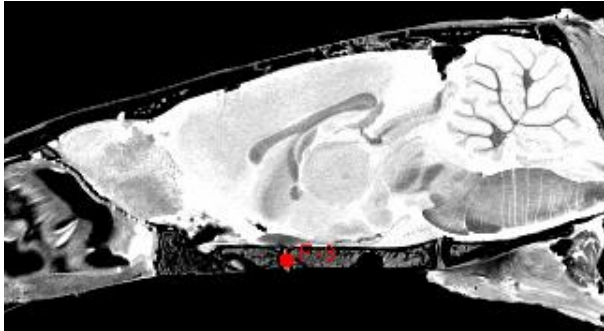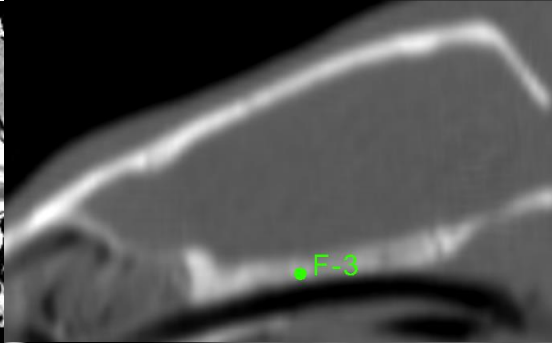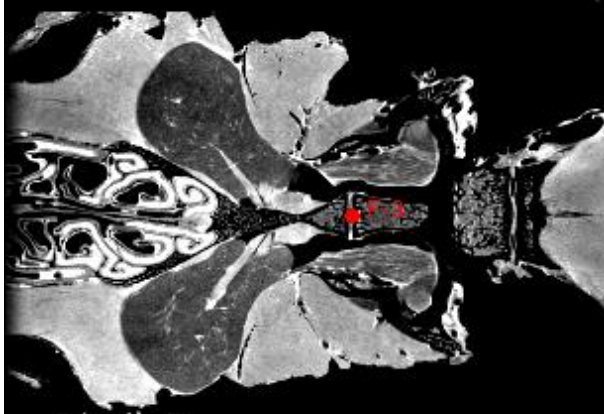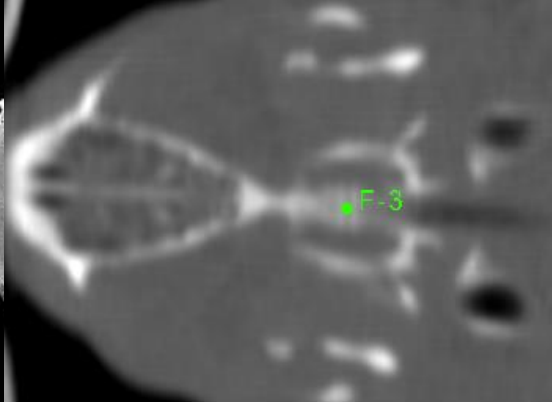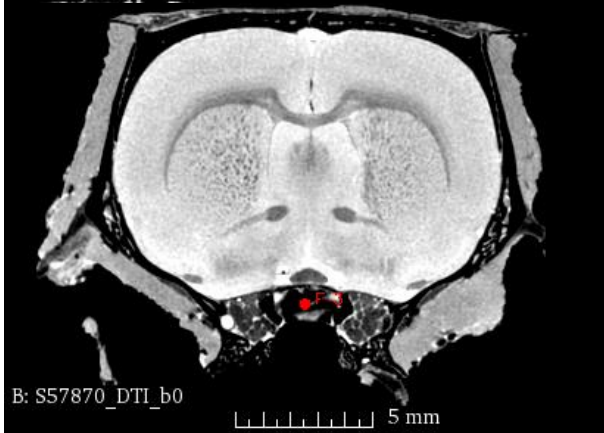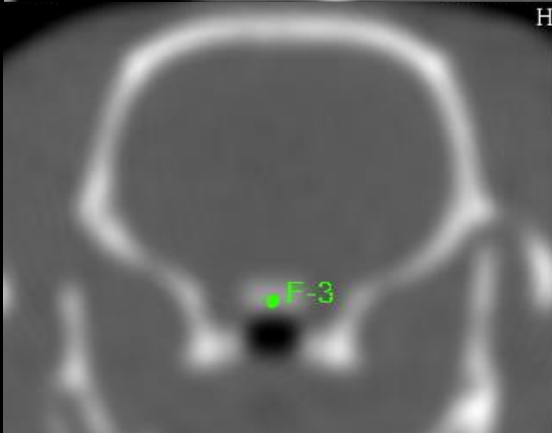

B: S57870\_DTI\_b0

5 mm

H

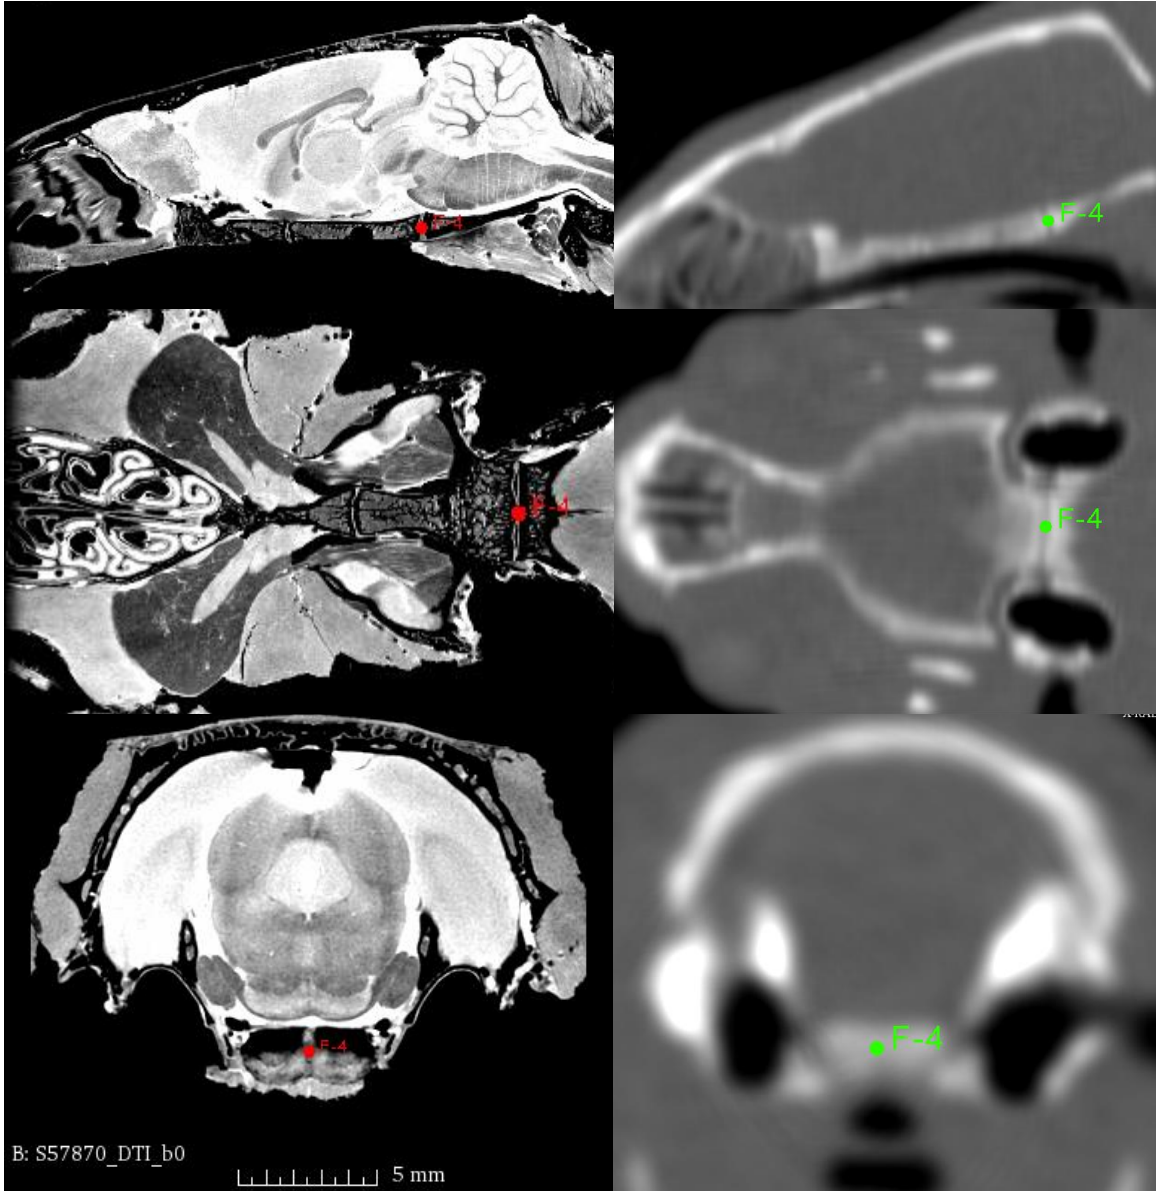

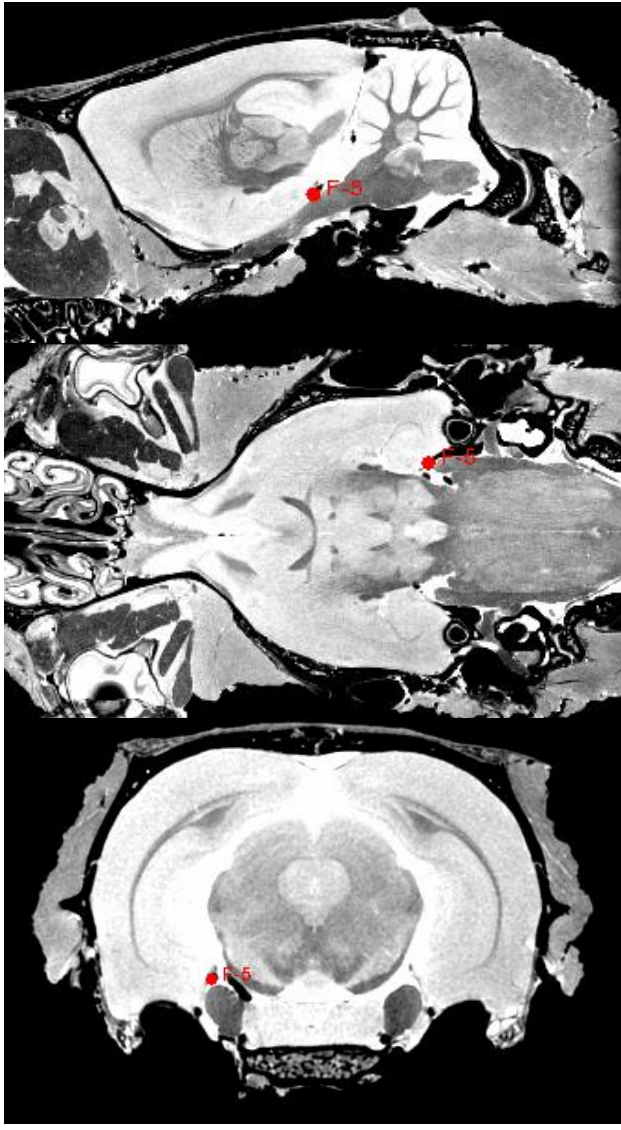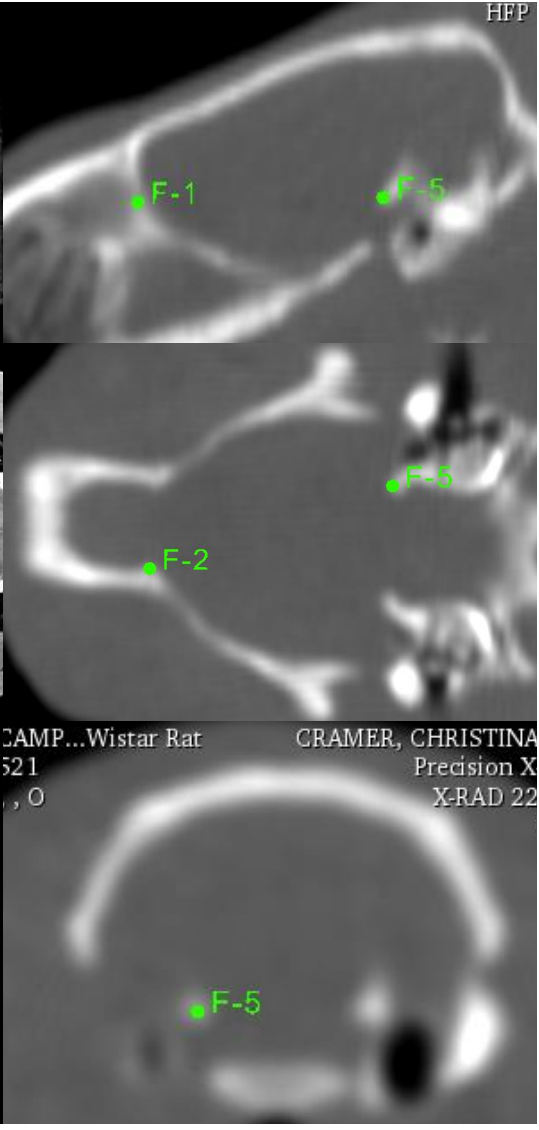

HFP

CAMP...Wistar Rat  
521  
, O

CRAMER, CHRISTINA  
Precision X  
X-RAD 22

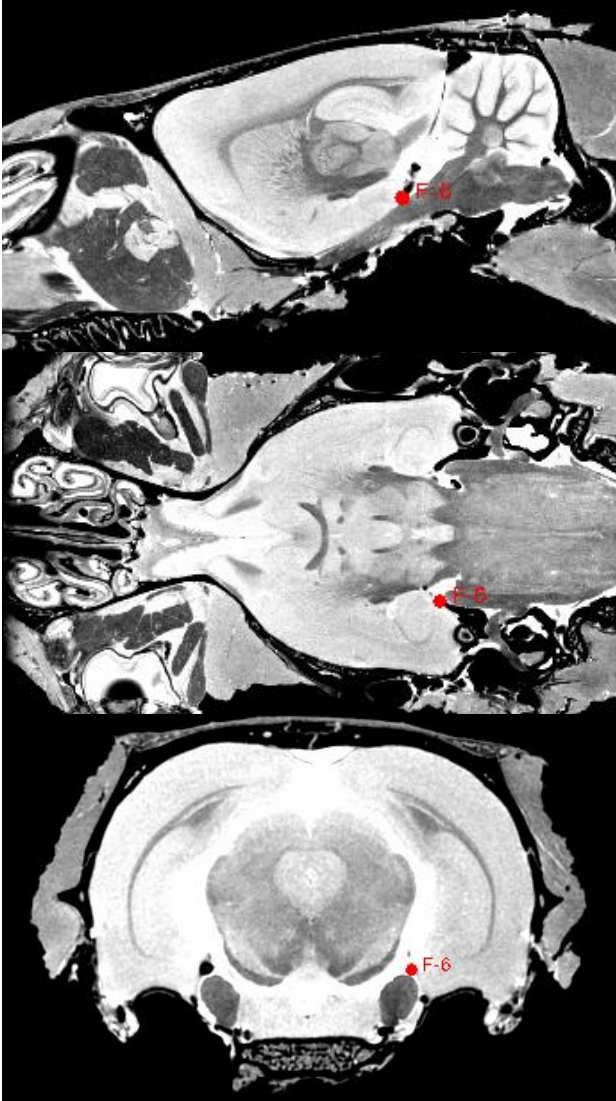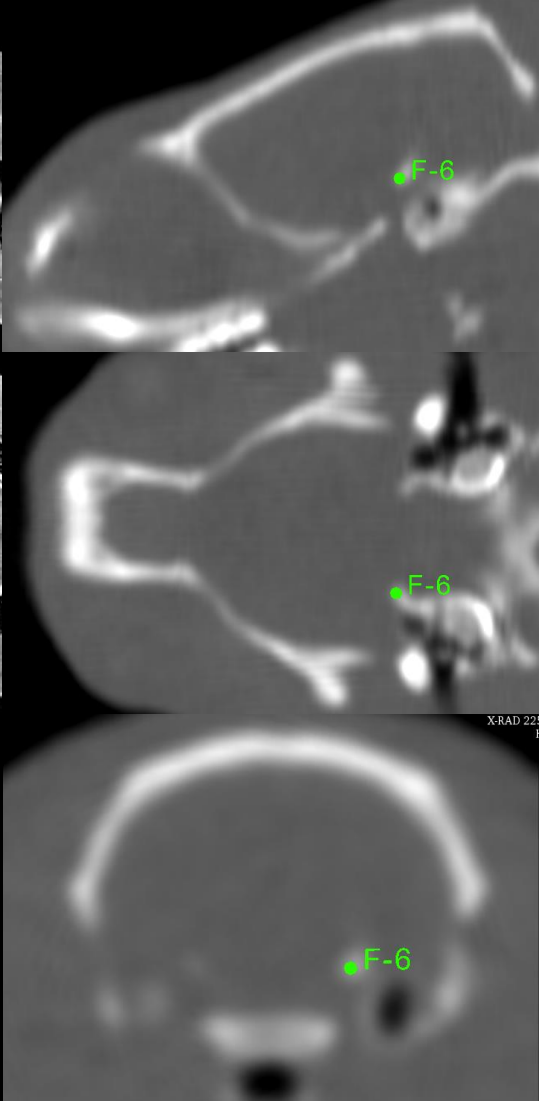

Supplement: pone.0143208.s001.pdf [file pone.0143208.s001.pdf]
